# Supplementary material for: Analysis of the Antioxidant Mechanism of Tamarix ramosissima Roots under NaCl Stress Based on Physiology, Transcriptomic and Metabolomic
Source: MDPI journal article supplement (doi:10.3390/antiox11122362), 2022-11-28
Supplement: s1 [file s1]

**Supplementary Table S1.** The sequences of specific primers

| ID | Primer Name           | Primer Sequence (5'-3')                                       |
|----|-----------------------|---------------------------------------------------------------|
| 1  | <i>Unigene0010026</i> | F: CAAGTCTTCGTGTCCGTATGTGGAA<br>R: CAGAAGCAGTAGCGTCGGTTGATAA  |
| 2  | <i>Unigene0089761</i> | F: AAGGATCTCCACGATGCCATTGC<br>R: CCTGTTCAGAACCAAGCGACCAA      |
| 3  | <i>Unigene0105663</i> | F: TGAGCCAGAGCAGTGTCCAGAA<br>R: CCAGCCACTTCGTTCAGGTCTTG       |
| 4  | <i>Unigene0015109</i> | F: TCATGCCTCAAGACCCATACAACAG<br>R: CGTGCTTCCTCTTCACCGTTCC     |
| 5  | <i>Unigene0007782</i> | F: GCTGCTGCCGAGATTGTGATTAGT<br>R: GACAACTTGGCGGAGAGGTTATGG    |
| 6  | <i>Unigene0089358</i> | F: CGCAATGTGCTGAGTGAGTATGGT<br>R: CAACAGTAAGACCAGGACCGAACC    |
| 7  | <i>Unigene0020552</i> | F: TGAGGACATAGTGCTTGCTGATTCTG<br>R: TTGAAGTGGCTGTATGCTTGAGGAA |
| 8  | <i>Unigene0035407</i> | F: TGGTAGTGGTGTTACGAGGTCAAAC<br>R: TGTTTCATCACTTCCTGGCTCTTGC  |
| 9  | <i>Unigene0027643</i> | F: GGAAGAACCTTGCTCCTGTCAATCA<br>R: ACTCTTTATCCACACCAAGCCACAC  |
| 10 | <i>Tubulin</i>        | F: GCTGAGATTACAACCGCTG<br>R: CTGTTCGTTTGGTCTTGATT             |

Note: F means sense primer; R means anti-sense primer.

**Supplementary Table S2.** Differential metabolites in flavonoid biosynthesis pathway

| Name                 | Formula                                        | Molecular Weight | PPM      | RT [min] | m/z    | Control group-0h-1 | Control group-0h-2 | Control group-0h-3 | NaCl-48h-1 | NaCl-48h-2 | NaCl-48h-3 | NaCl-168h-1 | NaCl-168h-2 | NaCl-168h-3 |
|----------------------|------------------------------------------------|------------------|----------|----------|--------|--------------------|--------------------|--------------------|------------|------------|------------|-------------|-------------|-------------|
| Pinocembrin          | C <sub>15</sub> H <sub>12</sub> O <sub>4</sub> | 256.07           | 2.61     | 10.59    | 257.08 | 27.22              | 27.08              | 27.48              | 30.76      | 30.73      | 31.00      | 29.79       | 29.92       | 29.85       |
| Phloretin            | C <sub>15</sub> H <sub>14</sub> O <sub>5</sub> | 274.08           | 1.40     | 7.68     | 275.09 | 24.66              | 24.83              | 24.75              | 27.21      | 26.99      | 26.90      | 26.04       | 25.71       | 26.11       |
| Eriodictyol          | C <sub>15</sub> H <sub>12</sub> O <sub>6</sub> | 288.06           | 1.31     | 10.05    | 289.07 | 24.21              | 24.14              | 24.79              | 30.00      | 30.06      | 29.88      | 26.56       | 26.98       | 26.76       |
| (-)-Epigallocatechin | C <sub>15</sub> H <sub>14</sub> O <sub>7</sub> | 288.06           | 58845.59 | 6.10     | 289.07 | 22.73              | 22.11              | 23.92              | 25.98      | 25.73      | 25.36      | 24.31       | 24.26       | 24.12       |
| Dihydromyricetin     | C <sub>15</sub> H <sub>12</sub> O <sub>8</sub> | 320.06           | 11.66    | 6.56     | 365.06 | 24.18              | 24.24              | 23.72              | 22.46      | 22.77      | 22.60      | 25.13       | 25.52       | 25.01       |

Note: All of the data inside the table are relative quantitative values, no unit required.

**Supplementary Table S3.** Candidate key genes in the flavonoid biosynthesis pathway

| Gene ID               | Description                                        | Log <sub>2</sub> fold-change         |                                       |                                       |
|-----------------------|----------------------------------------------------|--------------------------------------|---------------------------------------|---------------------------------------|
|                       |                                                    | Control group-0h vs. 200 mM NaCl-48h | 200 mM NaCl-48h vs. 200 mM NaCl -168h | Control group-0h vs. 200 mM NaCl-168h |
| <i>Unigene0007782</i> | Chalcone synthase                                  | 2.56                                 | -1.51                                 | 1.05                                  |
| <i>Unigene0089358</i> | Predicted: probable chalcone-flavonone isomerase 3 | 3.58                                 | -2.54                                 | 1.04                                  |

**Supplementary Table S4.** 15 homologous species Information Sheet for *Unigene0007782*

| Family        | Species                                     | Description                                        | Protein ID     | CDS (bp) | ORF length (aa) |
|---------------|---------------------------------------------|----------------------------------------------------|----------------|----------|-----------------|
| Asteraceae    | <i>Lactuca sativa</i>                       | Chalcone isomerase-like protein 2                  | XP_023770992.1 | 621      | 206             |
| Proteaceae    | <i>Macadamia integrifolia</i>               | Chalcone isomerase-like protein 2                  | XP_042503463.1 | 633      | 210             |
| Ericaceae     | <i>Vaccinium corymbosum</i>                 | Chalcone isomerase                                 | AYC35388.1     | 630      | 209             |
| Euphorbiaceae | <i>Hevea brasiliensis</i>                   | Probable chalcone-flavonone isomerase 3            | XP_021684778.1 | 630      | 209             |
| Proteaceae    | <i>Telopea speciosissima</i>                | Chalcone isomerase-like protein 2 isoform X1       | XP_043723638.1 | 630      | 209             |
| Amaranthaceae | <i>Beta vulgaris</i> subsp. <i>vulgaris</i> | Chalcone isomerase-like protein 2 isoform X1       | XP_048494133.1 | 633      | 210             |
| Asteraceae    | <i>Tanacetum cinerariifolium</i>            | Chalcone isomerase                                 | GEW79335.1     | 621      | 206             |
| Caricaceae    | <i>Carica papaya</i>                        | Probable chalcone-flavonone isomerase 3 isoform X1 | XP_021904134.1 | 636      | 211             |
| Asteraceae    | <i>Erigeron canadensis</i>                  | Chalcone isomerase-like protein 2                  | XP_043636289.1 | 633      | 210             |
| Fagaceae      | <i>Quercus suber</i>                        | Probable chalcone-flavonone isomerase 3            | XP_023907747.1 | 630      | 209             |
| Fagaceae      | <i>Quercus lobata</i>                       | Probable chalcone-flavonone isomerase 3            | XP_030932490.1 | 630      | 209             |
| Euphorbiaceae | <i>Manihot esculenta</i>                    | Chalcone isomerase-like protein 2                  | XP_021617615.1 | 630      | 209             |
| Theaceae      | <i>Camellia sinensis</i>                    | Probable chalcone-flavonone isomerase 3            | XP_028070241.1 | 630      | 209             |
| Theaceae      | <i>Camellia fraterna</i>                    | Chalcone isomerase                                 | AUT30534.1     | 630      | 209             |
| Rosaceae      | <i>Prunus persica</i>                       | Probable chalcone-flavonone isomerase 3            | XP_007218407.1 | 630      | 209             |

**Supplementary Table S5.** 15 homologous species Information Sheet for *Unigene0089358*

| Family        | Species                                        | Description                  | Protein ID     | CDS (bp) | ORF length (aa) |
|---------------|------------------------------------------------|------------------------------|----------------|----------|-----------------|
| Amaranthaceae | <i>Beta vulgaris</i><br>subsp. <i>vulgaris</i> | Chalcone synthase            | XP_010682889.2 | 1179     | 392             |
| Polygonaceae  | <i>Fagopyrum</i><br><i>tataricum</i>           | Chalcone synthase            | ACZ51475.1     | 1188     | 395             |
| Nelumbonaceae | <i>Nelumbo</i><br><i>nucifera</i>              | Predicted: chalcone synthase | XP_010249317.1 | 1182     | 393             |
| Asteraceae    | <i>Gynura</i><br><i>bicolor</i>                | Chalcone synthase            | BAJ17656.1     | 1197     | 398             |
| Sapindaceae   | <i>Koeleruteria</i><br><i>paniculata</i>       | Chalcone synthase            | QXN66168.1     | 1182     | 393             |
| Asteraceae    | <i>Chamaemelum</i><br><i>nobile</i>            | Chalcone synthase            | ASW41112.1     | 1200     | 399             |
| Lythraceae    | <i>Punica</i><br><i>granatum</i>               | Chalcone synthase            | XP_031381600.1 | 1197     | 398             |
| Sapindaceae   | <i>Dimocarpus</i><br><i>longan</i>             | Chalcone synthase            | AEO36981.1     | 1182     | 393             |
| Malvaceae     | <i>Hibiscus</i><br><i>syriacus</i>             | Chalcone synthase            | XP_039069650.1 | 1191     | 396             |
| Vitaceae      | <i>Vitis riparia</i>                           | Chalcone synthase-like       | XP_034707297.1 | 1182     | 393             |
| Vitaceae      | <i>Nekemias</i><br><i>grossedentata</i>        | Chalcone synthase            | QUE49096.1     | 1182     | 393             |
| Anacardiaceae | <i>Pistacia vera</i>                           | chalcone synthase 2          | XP_031255866.1 | 1194     | 397             |
| Meliaceae     | <i>Dysoxylum</i><br><i>binectariferum</i>      | Chalcone synthase            | AMR58953.1     | 1188     | 395             |
| Rutaceae      | <i>Citrus sinensis</i>                         | Chalcone synthase 2          | NP_001306986.1 | 1176     | 391             |
| Myrtaceae     | <i>Syzygium</i><br><i>oleosum</i>              | Chalcone synthase            | XP_030450429.1 | 1191     | 396             |

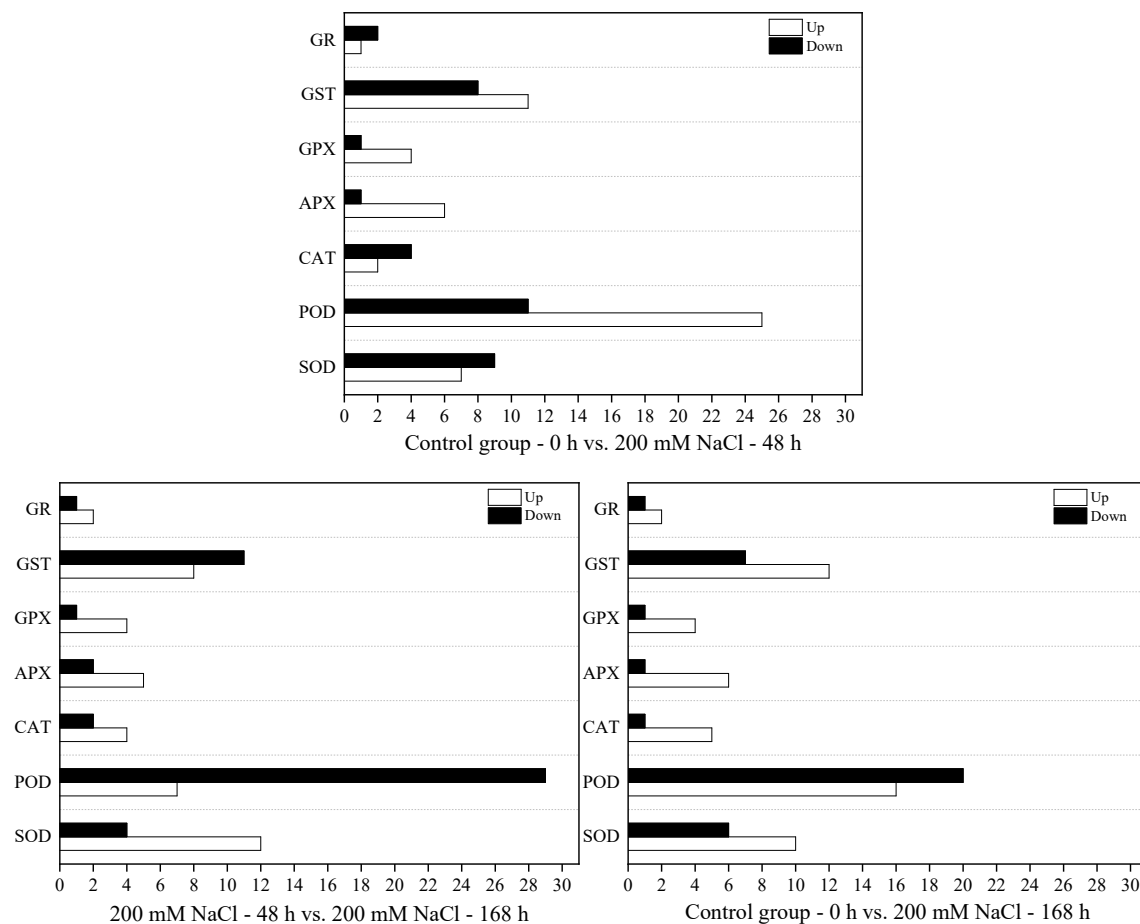

**Supplementary Figure S1.** Statistical chart of the expression number of key genes of antioxidant enzymes in the roots of *T. ramosissima* under NaCl stress

(The number of up- and down-regulated expression of candidate genes for antioxidant enzyme activities in roots of *T. ramosissima* under NaCl stress. Note: SOD: superoxide dismutase; POD: peroxidase; CAT: catalase; APX: ascorbic acid peroxidase; GPX: glutathione peroxidase; GST: glutathione S-transferase; GR: glutathione reductase).

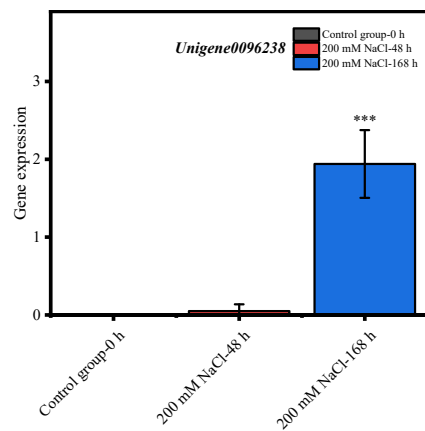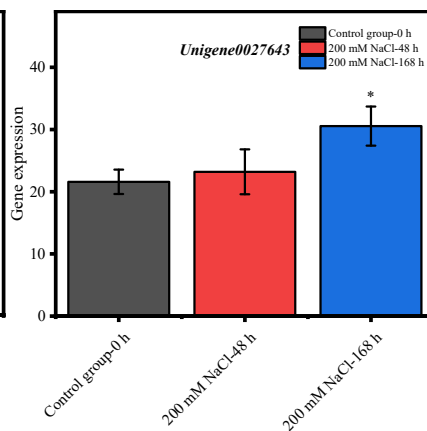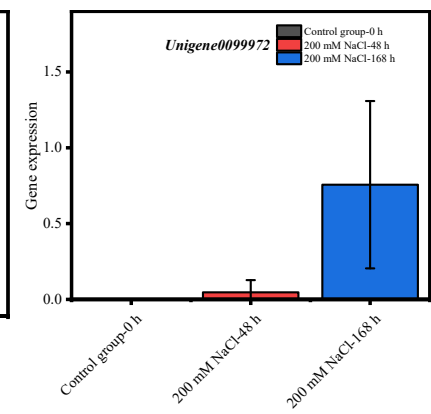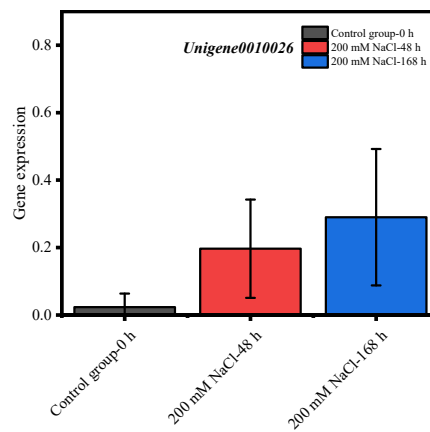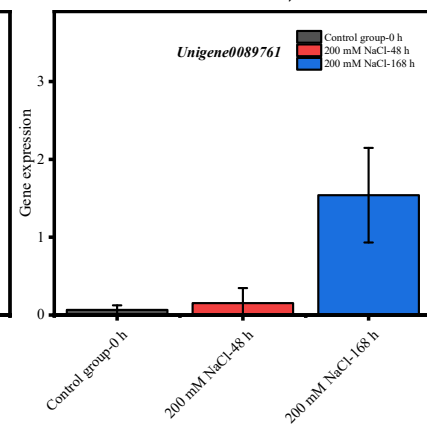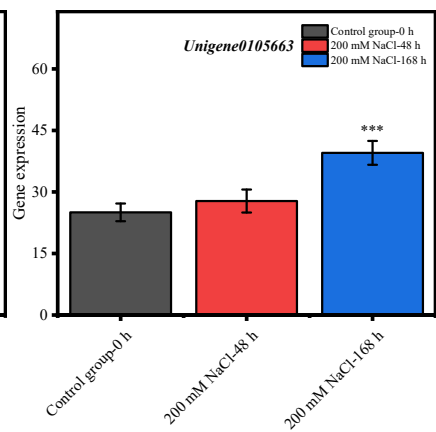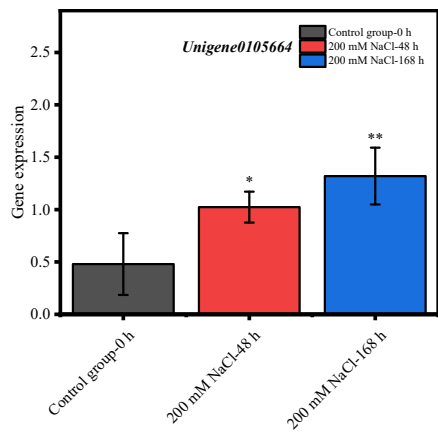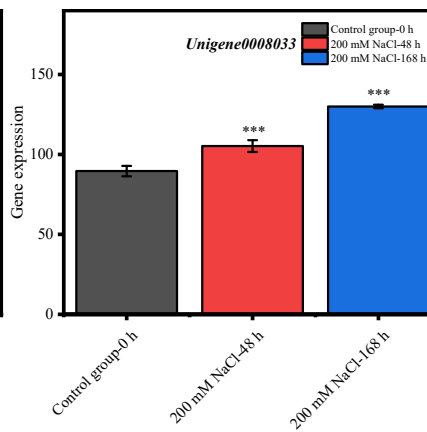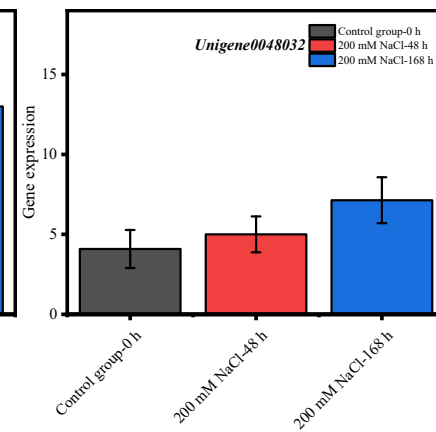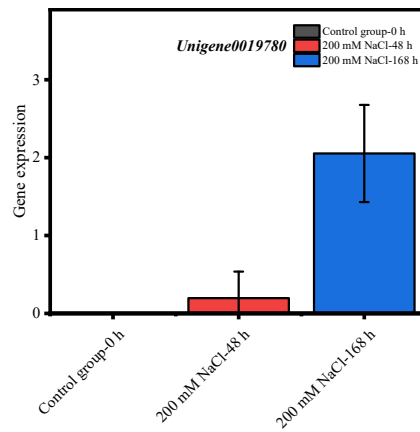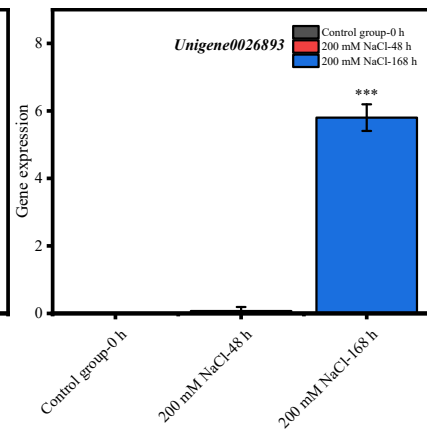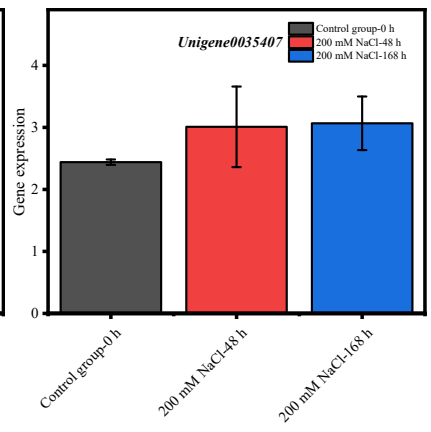

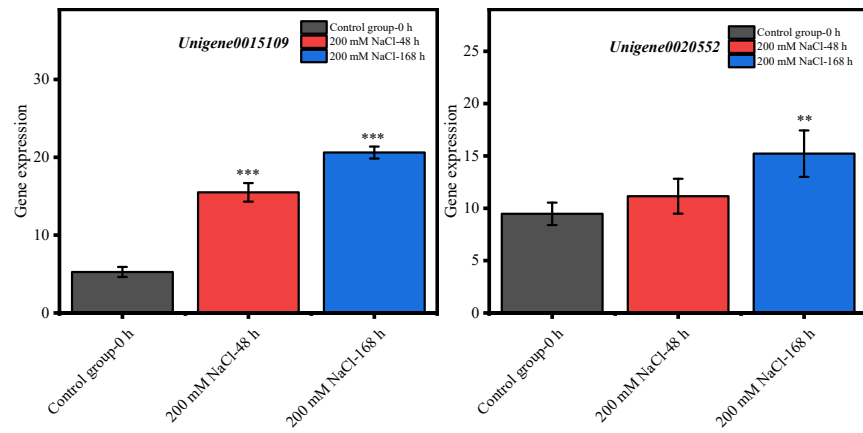

**Supplementary Figure S2.** Expression levels of differentially expressed genes related to antioxidant enzyme activity (The expression levels of 14 differentially expressed genes related to antioxidant enzyme activity in the roots of *T. ramosissima* were up-regulated during 48h and 168h under NaCl stress. Note:  $p \geq 0.05$  is not marked;  $0.01 < p < 0.05$  is marked as \*;  $0.001 < p < 0.01$  is marked as \*\*;  $p \leq 0.001$  is marked as \*\*\*.)



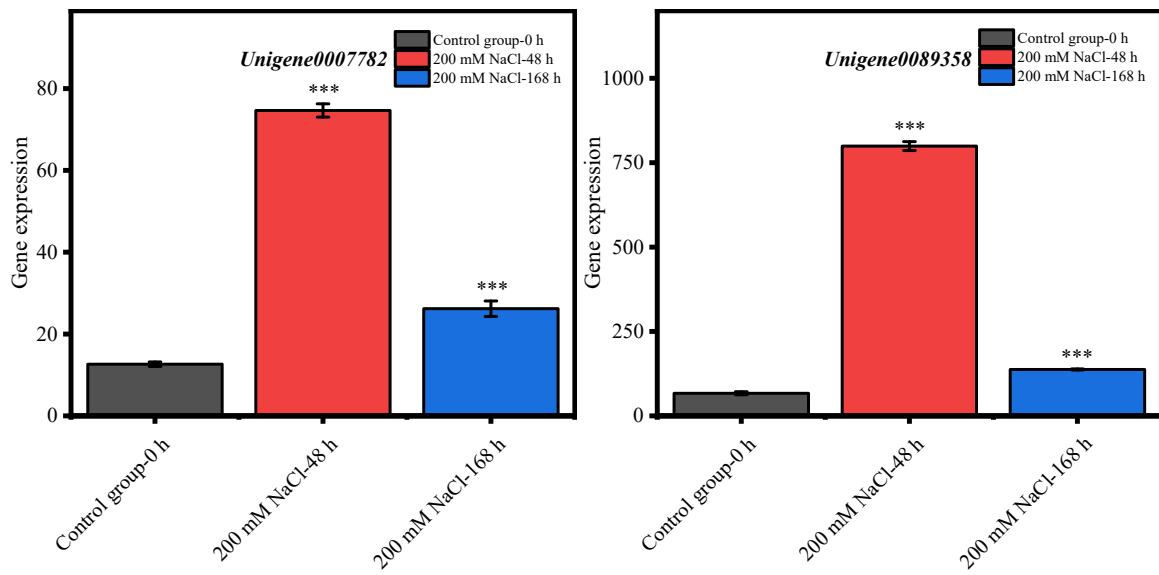

**Supplementary Figure S3.** The expression levels of candidate key genes in flavonoid biosynthesis pathway (*Unigene0007782* and *Unigene0089358* play an important role in flavonoid biosynthesis pathway of *T. ramosissima* roots at 48h and 168h under NaCl stress. Note:  $p \geq 0.05$  is not marked;  $0.01 < p < 0.05$  is marked as \*;  $0.001 < p < 0.01$  is marked as \*\*;  $p \leq 0.001$  is marked as \*\*\*).

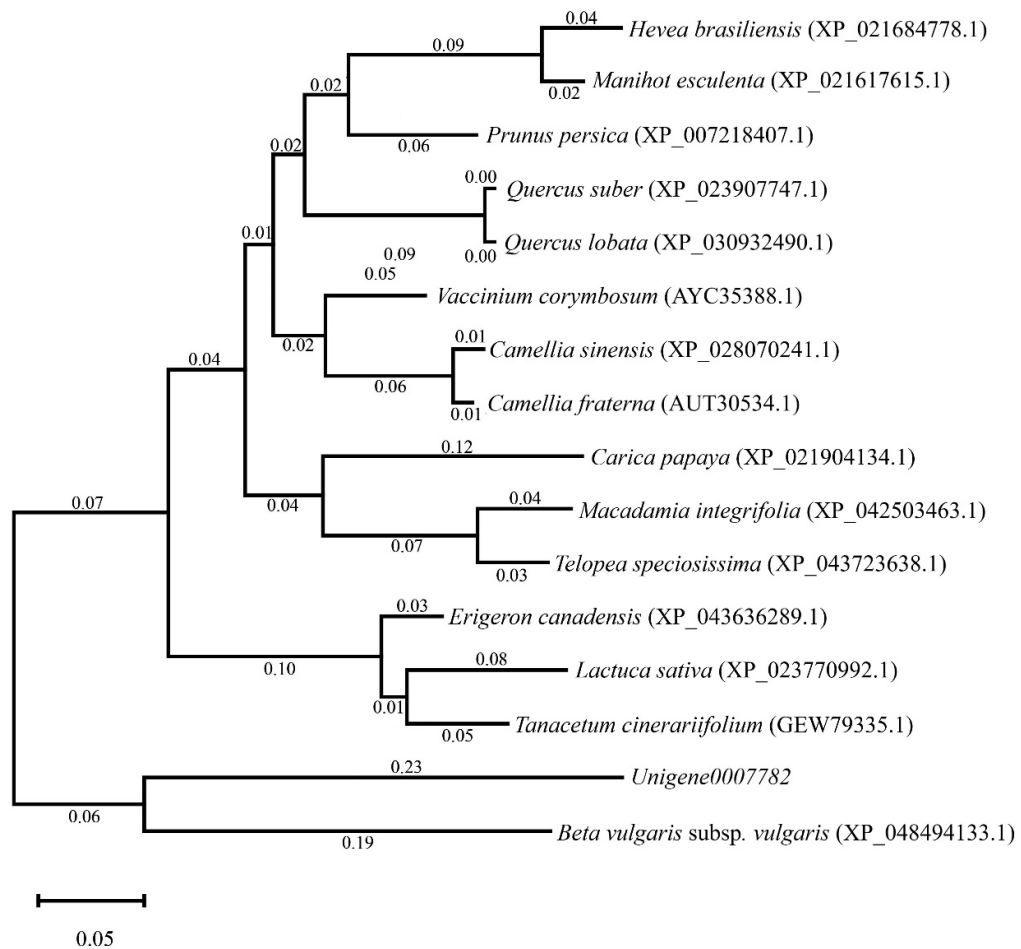

**Supplementary Figure S4.** Phylogenetic tree analysis of *T. ramosissima* chalcone-flavonone isomerase and other species chalcone-flavonone isomerase (Phylogenetic tree analysis of Unigene0007782 protein amino acid sequence of *T. ramosissima* roots and protein amino acid sequence of other 15 species under NaCl stress).

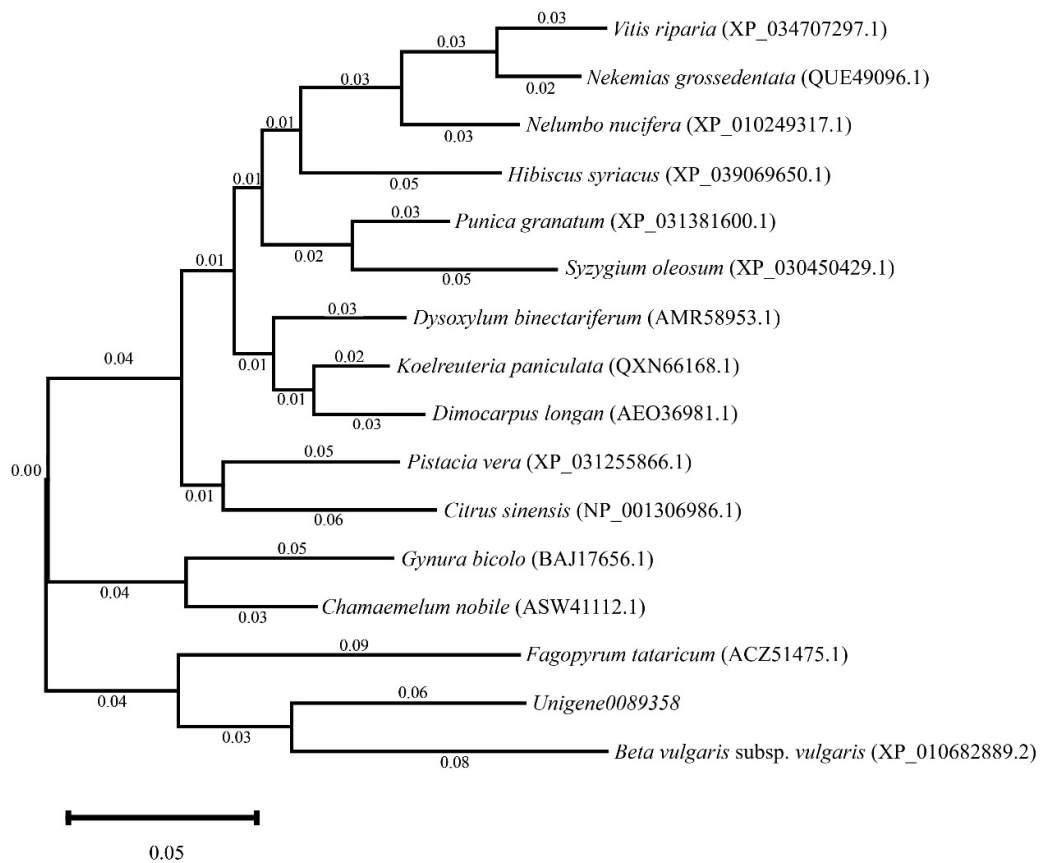

**Supplementary Figure S5.** Phylogenetic tree analysis of *T. ramosissima* chalcone synthase and other species chalcone synthase (Phylogenetic tree analysis of Unigene0089358 protein amino acid sequence of *T. ramosissima* roots and protein amino acid sequence of other 15 species under NaCl stress).
